## 1 **Making a Case for an Autism-Specific Multimorbidity Index: A Comparative Cohort Study**

2 Dr Filip Sosenko<sup>1\*</sup>, Dewy Nijhof<sup>1\*</sup>, Dr Laura McKernan Ward<sup>2</sup>, Prof. Deborah Cairns<sup>1</sup>, Dr Laura  
3 Hughes<sup>1</sup>, Dr Ewelina Rydzeswka<sup>3</sup>, on behalf of the CVD-COVID-UK/COVID-IMPACT Consortium

4 <sup>1</sup>University of Glasgow, School of Mental Health and Wellbeing

5 <sup>2</sup>University of Dundee, Health Informatics Centre

6 <sup>3</sup>University of Edinburgh, School of Health in Social Science

7

8 *\*Joint first authors*

9 *Corresponding author: Dr Filip Sosenko, [filip.sosenko@glasgow.ac.uk](mailto:filip.sosenko@glasgow.ac.uk)*

10

11 **Keywords:** Autism Spectrum Disorder, Multimorbidity, Multimorbidity Index, COVID-19,  
12 Mortality, Long-term Conditions

13

### 14 **Abstract**

15 Autistic people experience challenges in healthcare, including disparities in health outcomes  
16 and multimorbidity patterns distinct from the general population. This study investigated the  
17 efficacy of existing multimorbidity indices in predicting COVID-19 mortality among autistic  
18 adults and proposes a bespoke index, the ASD-MI, tailored to their specific health profile.  
19 Using data from the CVD-COVID-UK/COVID-IMPACT Consortium, encompassing England's  
20 entire population, we identified 1,027 autistic adults hospitalized for COVID-19, among whom  
21 62 died due to the virus. Employing logistic regression with 5-fold cross-validation, we selected  
22 diabetes, coronary heart disease, and thyroid disorders as predictors for the ASD-MI,  
23 outperforming the Quan Index, a general population-based measure, with an AUC of 0.872  
24 versus 0.828, respectively. Notably, the ASD-MI exhibited better model fit (pseudo-R<sup>2</sup> 0.25)  
25 compared to the Quan Index (pseudo-R<sup>2</sup> 0.20). These findings underscore the need for  
26 tailored indices in predicting mortality risks among autistic individuals. However, caution is  
27 warranted in interpreting results, given the limited understanding of morbidity burden in this  
28 population. Further research is needed to refine autism-specific indices and elucidate the  
29 complex interplay between long-term conditions and mortality risk, informing targeted  
30 interventions to address health disparities in autistic adults. This study highlights the

**NOTE:** This preprint reports new research that has not been certified by peer review and should not be used to guide clinical practice.

31 importance of developing healthcare tools tailored to the unique needs of neurodivergent  
32 populations to improve health outcomes and reduce disparities.

### 33 **Introduction**

34 Autism Spectrum Disorder (ASD) is a neurodevelopmental disorder characterised mainly by  
35 differences in social communication and interaction, and repetitive and restrictive  
36 behaviours, including differences in sensory preferences (1). Autistic people are estimated to  
37 account for 0.6 to 1.0% of the global population (2–4). They experience substantial health  
38 inequalities, including multimorbidity (5,6), defined as the presence of at least two long-term  
39 conditions (LTCs) (7). ASD has been proposed as a potential risk factor for the development of  
40 COVID-19 infections due to a number of factors including; experiencing difficulties in  
41 maintaining social distancing (8), and use of atypical antipsychotics, such as risperidone,  
42 frequently prescribed to individuals with ASD (9), which has been shown to disrupt immune  
43 responses (10), and therefore increase the risk of COVID-19 infection and mortality.

44 Autistic people have a different pattern of multimorbidity compared to the general  
45 population (11,12) which can result in premature mortality (13,14). What is more, literature  
46 suggests that autistic people are likely to experience poor physical health (12,15), high  
47 prevalence of multimorbidity (16), and premature mortality (13,17,18). This highlights the  
48 necessity of capturing the full burden of multimorbidity to detect poor health and provide  
49 suitable care.

50 Multimorbidity indices, which are used to predict the prognosis of patients based on their  
51 medical history or to measure the comorbidity burden, are currently based on the general  
52 population (19–21), and may not be applicable to the population with ASD. Multimorbidity  
53 indices use previous and current diagnoses as predictors for the outcome of interest, such as  
54 quality of life, hospital admissions, healthcare use, and mortality (22,23). Alternatively, the  
55 index is used to control for long-term conditions or multimorbidity while studying other  
56 associations.

57 A variety of multimorbidity indices exist, and characteristics amongst these instruments vary  
58 in terms of included LTCs, weighting of LTCs and even outcome measures (22). The most used  
59 and well-known index is the Charlson Comorbidity Index (CCI) which uses scores for 17 LTCs  
60 to predict the ten-year risk of death within one year after hospital admission (19). Since its

61 conception, several modifications of the CCI have been created, ranging in which LTCs are  
62 included, total number of diseases included, weights of individual LTCs and overall score  
63 construction (22). The most well-known modifications include the Elixhauser Index (including  
64 30 – or, for some variants, 31 – LTCs) (20) and the van Walraven (VW) variant of the Elixhauser  
65 Index, which includes a weighted summary score for streamlined use, based on the 30 LTCs  
66 from the Elixhauser Index (21). The Quan Index is a relatively recent mortality prediction tool  
67 utilized in healthcare settings, primarily focused on in-hospital mortality risk assessment.  
68 Unlike the Charlson Index, which includes 17 Long-Term Conditions (LTCs), the Quan Index  
69 streamlines the assessment by incorporating only 12 LTCs (24). These LTCs are determined  
70 based on International Classification of Diseases, 10th Revision (ICD-10) codes. One notable  
71 feature of the Quan Index is its utilization of up-to-date population health data from six  
72 different countries to inform the construction of weights assigned to each LTC, enhancing the  
73 predictive accuracy of the index (24).

74 Most indices use scores to estimate prognosis, with higher scores usually being indicative of  
75 more severe risk of death. These scores are usually additive, where the presence of multiple  
76 LTCs will lead to a higher score. Scores are based on weights for each condition, which usually  
77 are derived from the modelling of the risk, in which the weight quantifies their contribution  
78 towards the outcome. The long history of development and validation of these instruments  
79 has resulted in establishing strong evidence of associations between multimorbidity and  
80 mortality risk, decline in physical and mental functioning, and quality of life (22,23). However,  
81 less research has focused on the selection criteria for inclusion of LTCs and most indices are  
82 constructed for the general population (22).

83 As common physical and mental LTCs differ in the population with ASD compared from those  
84 in the general population (13,25,26), this may be of importance. For example, autistic people  
85 have a high burden of mental health conditions such as anxiety, depression and schizophrenia  
86 (14,27). Autistic people are also more likely to experience co-occurring physical conditions,  
87 such as epilepsy, autoimmune disorders and obesity (14,27). Therefore, the effectiveness and  
88 sensitivity of the established multimorbidity indices for the prediction of health outcomes in  
89 the autistic population and subsequent treatment based on those predictions warrants an  
90 investigation into their validity. Indeed, studies examining the association between LTCs and  
91 mortality in autistic people make use of established multimorbidity indices, such as the CCI,

92 but include LTCs known to be prevalent in the autistic population (14,27). These studies found  
93 that the included LTCs, such as epilepsy, mental health conditions (e.g., bipolar disorder,  
94 schizophrenia, major depressive disorder) or intellectual disabilities carried higher risk of  
95 death in the autistic population (14,27). This suggests that traditional indices may not  
96 accurately reflect the health profile or capture the full extent of multimorbidity and its  
97 concurrent risk for the autistic population.

98 To our knowledge, there has been no previous research into the effectiveness of using existing  
99 multimorbidity indices to investigate health outcomes in autistic people nor does a  
100 multimorbidity index specifically tailored for autistic populations exist. As such, the current  
101 study aims to address this gap in the existing literature by investigating the effectiveness and  
102 sensitivity of an established multimorbidity index compared to a specifically tailored index,  
103 hereafter called Autism Spectrum Disorder Multimorbidity Index (ASD-MI), in predicting  
104 COVID-19 mortality within the autistic population. This study represents a supplementary  
105 analysis derived from a broader investigation examining COVID-19 outcomes in autistic adults  
106 (28,29). As such, the study design employed a convenience sampling approach, necessitated  
107 by the availability of relevant data sources.

## 108 **Methods**

### 109 ***Data sources***

110 This was part of a larger cross-sectional study using a whole-country population covering  
111 England (30,31). It was conducted on behalf of, and accessed data made available in NHS  
112 England's Secure Data Environment service for England, the [CVD-COVID-UK/COVID-IMPACT](#)  
113 [Consortium](#) (coordinated by the BHF Data Science Centre). The datasets used for the current  
114 study were Hospital Episode Statistics (HES), COVID-19 Hospitalisation in England Surveillance  
115 System (CHESS), Second Generation Surveillance System (SGSS), General Practice Extraction  
116 Service (GPES) Data for Pandemic Planning and Research (GDPPR) and Civil Registry Deaths  
117 from the Office for National Statistics (ONS-D). All but the last of these datasets are updated  
118 through the National Health Service (NHS) and processed by NHS England who then opens up  
119 the data for secondary use. The ONS-D dataset is updated through the ONS. Data from 1  
120 March 2020 up to and including 31 December 2021 was used. Data linkage was conducted  
121 using an anonymised version of the NHS number (a ten-digit number used as a unique

122 identifier within the UK NHS to identify patients). Ethical approval was obtained from the CVD-  
123 COVID-UK/COVID-IMPACT Consortium and the University of Glasgow Ethics Committee.

124

125 Autistic people were identified using SNOMED concepts sourced from the GPPR and HES  
126 'Autism Diagnosis Codes' cluster<sup>1</sup> (cluster AUTISM COD version 2021/12/21). With regards to  
127 the long-term conditions considered as 'candidates' for the ASD-MI, thirty-five long-term  
128 conditions common to the UK population were identified (32) (see Supplementary materials,  
129 table 1). One-year look-back window (in HES) was used to identify patients with a given  
130 condition, counting from the date of COVID-19 admission.

131

132 Demographic (age, sex, ethnicity, Index of Multiple Deprivation (IMD)) and LTCs were  
133 explored using percentages of total autistic population. IMD decile is a measure used in the  
134 United Kingdom to assess relative deprivation across different areas or regions. The IMD ranks  
135 from 1 (most deprived) to 10 (least deprived) based on several indicators of deprivation, such  
136 as income, employment, education, health, crime, and living environment. In our analyses,  
137 instead of having 10 distinct deciles, the IMD rankings were grouped into 5 categories, each  
138 representing a range of deprivation levels. This grouping simplifies the interpretation of  
139 deprivation levels and facilitates comparisons between areas.

140 The decision to compare our ASD-MI to the Quan Index rather than the Charlson Index was  
141 carefully considered. Firstly, our study was constrained by the requirement to use ICD-10 code  
142 mapping, which is a feature supported by the Quan Index but not the Charlson Index (24).  
143 Furthermore, the Quan Index's more recent update and incorporation of contemporary  
144 population health data from six countries provided a distinct advantage (24). This up-to-date  
145 information enhances the predictive capabilities of the Quan Index, aligning with our study's  
146 objective of accurately predicting in-hospital mortality risk among autistic adults with COVID-  
147 19. To predict in-hospital mortality, the Quan Index includes 12 LTCs instead of the original  
148 17 used in the Charlson Index to construct weights (33) (see Supplementary materials, table

---

<sup>1</sup> Primary Care Domain Reference Set Portal. NHS Digital, <https://digital.nhs.uk/data-and-information/data-collections-and-data-sets/data-collections/quality-and-outcomes-framework-qof/quality-and-outcome-framework-qof-business-rules/primary-care-domain-reference-set-portal> (accessed 8 August 2023).

149 2). Again, a one-year look-back window in HES was used to calculate the patient's Quan Index  
150 score.

151

### 152 **Population**

153 The study sample was drawn from a larger study sample that covered the whole population  
154 of England who were alive on 1 January 2020 (31). Adults who had a primary care diagnosis  
155 of autism and who were hospitalised for COVID-19 (defined as any CHES record, or a HES  
156 record with an ICD-10 code of U07.1 or U07.2 recorded in any position on the admission  
157 diagnosis). 'COVID-19 cause of death' was defined as a death that occurred within 28 days  
158 from the first day of admission and where COVID-19 was mentioned on the death certificate  
159 (either primary or other contributing causes using ICD-10 code U07.1 or U07.2). For the larger  
160 study, the total sample with confirmed COVID-19 was 32,372 autistic adults (see Table 1). The  
161 sample used to construct the multimorbidity index consisted of 1,027 autistic adults  
162 hospitalised for COVID-19, of which 62 died due to COVID-19. Data up to 31 December 2021  
163 was included.

164

### 165 **Data analysis**

166 All data analysis was conducted in Python 3.7 and SQL. The analysis was performed according  
167 to a pre-specified analysis plan published on GitHub, along with the phenotyping and analysis  
168 code ([https://github.com/BHFDSC/CCU030\\_03](https://github.com/BHFDSC/CCU030_03)).

169

170 In the first stage of data analysis, a forward variable selection procedure using logistic  
171 regression with 5-fold cross-validation was used to identify which of the 35 long-term  
172 conditions (see Supplementary materials, table 3) should be selected for the ASD-MI. Age was  
173 included as an additional predictor, as per procedure in the development of the CCI (19). The  
174 absence or presence of COVID-19 death was the outcome. Area Under the Curve (AUC) score  
175 was used as the model evaluation metric. Predictor selection was stopped when the AUC  
176 value of the model could not be further improved by at least 0.001. Once a final model was  
177 arrived at, coefficients of the long-term conditions from that model were then used to  
178 construct an ASD-MI Score for each condition.

179

180 Once the ASD-MI was ready, the second stage of data analysis commenced by assessing  
181 predictive performance of a model with the Quan Index and a model with the ASD-MI through  
182 5-fold cross validation with AUC as evaluation metric. The modelling employed logistic  
183 regression with the absence or presence of COVID-19 death as the outcome. Age was again  
184 included as a control variable.

185

## 186 **Results**

### 187 ***Demographics***

188 The results presented in Table 1 provide a comprehensive overview of the demographic and  
189 health characteristics of autistic adults hospitalised for COVID-19, categorised based on  
190 subsequent COVID-19 mortality outcomes. Among the total cohort of 1,030 hospitalised  
191 adults, 60 individuals died due to COVID-19, while 965 individuals did not. The median age of  
192 those who died from COVID-19 was notably higher at 63.4 years (interquartile range: 48.9 to  
193 75.2) compared to survivors, with a median age of 31.1 years (interquartile range: 23.6 to 50.0).  
194 A higher proportion of females were observed among survivors (40.6%) compared to those  
195 who died from COVID-19 (19.4%). Additionally, the mean IMD decile was similar between both  
196 groups, indicating comparable levels of deprivation. Regarding LTCs, individuals who  
197 subsequently died from COVID-19 had a higher mean count of LTCs (11.0) compared to  
198 survivors (7.4). Furthermore, several LTCs demonstrated notable differences in prevalence  
199 between the two groups, with higher proportions observed among individuals who died from  
200 COVID-19, although these results should be interpreted with caution due to small numbers.

201

### 202 ***Predictor Selection for the ASD-MI***

203 By employing a forward variable selection procedure using logistic regression with 5-fold  
204 cross-validation, we systematically evaluated the predictive capabilities of 35 long-term  
205 conditions (LTCs) in relation to COVID-19 mortality risk among autistic adults. This approach  
206 allowed us to identify the most influential LTCs associated with the outcome of interest. By  
207 iteratively assessing the model's performance using the Area Under the Curve (AUC) score  
208 as the evaluation metric, we identified three LTCs that consistently demonstrated the  
209 highest predictive power. The selected variables for the ASD-MI were diabetes, coronary  
210 heart disease and thyroid disorders. These LTCs emerged as significant contributors to the

211 ASD-MI, reflecting their strong association with COVID-19 mortality risk in this population.  
212 This process ensured that the selected LTCs were robust indicators of mortality risk,  
213 disregarding indicators that did not add to the predictive power of the model. Table 2 shows  
214 the coefficients of the LTCs included in the ASD-MI and their corresponding Odds Ratios.  
215 Using the coefficients from the model, the formula for the Multimorbidity Index (MI) was:

216  
217 
$$MI = 1.21 * DIA + 0.71 * CHD + 0.67 * THY$$

218 Where DIA refers to diabetes, CHD to coronary heart disease, and THY to thyroid disorders.  
219 Each are multiplied by their respective coefficients from the model.

220

### 221 ***Comparative Predictive Performance of the two models***

222 The logistic model using the ASD-MI had a higher AUC value of 0.872 than the model using  
223 the Quan Index, which had an AUC value of 0.828. Table 2 shows the regression results for  
224 both models using the Quan Index and the ASD-MI. Further, model fit is better for the model  
225 using the ASD-MI (pseudo-R<sup>2</sup> 0.25) than for the model using Quan Index (pseudo-R<sup>2</sup> 0.20).

226

### 227 **Discussion**

228 This feasibility study aimed to investigate whether there is a need for a specially tailored  
229 multimorbidity index to predict COVID-19-related mortality in autistic adults. Using LTCs that  
230 more accurately describe the health profile of the autistic population, the results show that  
231 our ASD-MI is moderately better at predicting the risk of COVID-19 death amongst autistic  
232 adults than a general population-based index. This study is a case in point to show the  
233 potential for development for general poor health outcomes specific to autistic adults,  
234 especially if trained for mortality outside of a COVID-19 context.

235 While our results suggest a better prediction of COVID-19 mortality in autistic adults using the  
236 three predictors of diabetes, coronary heart disease and thyroid dysfunction, caution should  
237 be used when interpreting these results. We emphasise that further research is needed to  
238 accurately predict all-cause mortality due to the known associations of these three conditions  
239 with COVID-19 (34–36). Current evidence on all-cause mortality in autistic individuals points  
240 mainly to external causes, such as suicide, and neurological disorders (13,14) It could well be



241 that the current study's formulation of the ASD-MI does not generalise well to all-cause  
242 mortality in autistic adults. Furthermore, relatively little is known about the morbidity burden  
243 of coronary heart disease and thyroid disorders in autistic individuals. This further emphasises  
244 the importance of studying the general health profile of autistic individuals and how a  
245 specifically tailored multimorbidity index could help in finding target LTCs for future research.

246 One aspect of the study that needs to be emphasised is that our ASD-MI, similar to the original  
247 CCI and Quan Index, was developed purely for the purpose of prediction. Accordingly,  
248 predictive power was the only criterion for selecting one model over another. Therefore, like  
249 the creators of earlier indices we did not aim to explain why selected LTCs were better  
250 predictors than LTCs that were ruled out. And we do not seek to justify LTC selection on  
251 grounds of existing knowledge and risk factors for COVID-19 mortality (see (37) for further  
252 discussion).

253 The current study did find significant differences in the predictive value of our ASD-MI and a  
254 standard index, despite limiting the data to COVID-19-related deaths in the peak of the global  
255 pandemic in England. Future research expanding this methodology to all-cause mortality  
256 using a larger window of time may yield larger sample sizes and more generalisable results.  
257 This would arguably help improve predicting mortality for autistic adults in healthcare  
258 settings. Further, it would help elucidate the multimorbidity profile of autistic adults by virtue  
259 of its selection criteria for included LTCs. Furthermore, these findings and future exploration  
260 of all-cause mortality may highlight LTCs and combinations of LTCs that are of most urgency  
261 to investigate in order to address increased mortality in autistic adults.

## 262 **Strengths and limitations**

263 This study has several strengths. It is the first study to investigate and construct a  
264 multimorbidity index specifically aimed at autistic adults. Foremost, the utilization of a whole-  
265 country population encompassing both autistic individuals and the general population  
266 ensures a comprehensive and representative sample, effectively mitigating potential  
267 sampling biases. Additionally, the study leverages validated datasets, further fortifying the  
268 credibility of the results. Furthermore, the inclusion criteria for autism diagnosis are  
269 meticulously defined based on clinical diagnoses, incorporating a wide range of older and  
270 newer diagnostic codes pertinent to autism. This comprehensive approach enables the study  
271 to capture a diverse spectrum of individuals on the autism spectrum, thereby offering a more

272 nuanced and accurate representation of the autistic population in England. Overall, these  
273 strengths collectively underscore the study's capacity to provide valuable insights into the  
274 health profiles and multimorbidity patterns among autistic individuals, contributing to a  
275 deeper understanding of their healthcare needs.

276

277 One potential limitation stems from the sample characteristics. Given the focus on evaluating  
278 the multimorbidity index within the context of COVID-19, the sample composition may be  
279 skewed, particularly in terms of age and sex distribution. Notably, while older age has been  
280 associated with increased COVID-19 mortality risk, the autistic sample in this study tended to  
281 be younger due to the higher rates of autism diagnosis in children and young individuals.  
282 Moreover, the male predominance in both COVID-19 cases and autism diagnoses introduces  
283 further complexity, potentially influencing the observed outcomes. These inherent biases  
284 may limit the extrapolation of study findings to broader populations. However, despite these  
285 limitations, this study contributes valuable insights into the health profiles of autistic  
286 individuals and underscores the importance of developing tailored tools to address their  
287 unique healthcare needs, thereby highlighting avenues for further research and exploration  
288 in this area.

289 Another potential limitation is the possible introduction of an inherent bias in the data due to  
290 the use of several code mappings to accommodate information coding in the different types  
291 of datasets and analysis tools used which originates from data linkage using multiple systems  
292 that use different codes within their electronic health records.

293 Further, while the follow-up time in the CCI and Quan Index is one year after admission, the  
294 current study used a follow-up time of 28 days in order to be consistent with the official  
295 definition of COVID-19 death.

## 296 **Conclusion**

297 This point in case study demonstrated that the use of our ASD-MI for the adult autistic  
298 population provides more accurate predictions of COVID-19 mortality in this population than  
299 a multimorbidity index based on the general population. It shows that application of the ASD-  
300 MI trained on all-cause mortality the autistic population may be more appropriate than the

301 use of multimorbidity indices based on the general population and could be used to elucidate  
302 key differences between the health profiles of autistic and non-autistic people.

303

#### 304 **Declarations**

##### 305 **Ethics approval and consent to participate**

306 The North East – Newcastle and North Tyneside 2 research ethics committee provided ethical  
307 approval for the CVD-COVID-UK/COVID-IMPACT research programme (REC No 20/NE/0161)  
308 to access, within secure trusted research environments, unconsented, whole-population, de-  
309 identified data from electronic health records collected as part of patients’ routine  
310 healthcare. The need for informed consent was waived by the North East – Newcastle and  
311 North Tyneside 2 research ethics committee. All methods were carried out in accordance with  
312 relevant guidelines and regulations.

##### 313 **Availability of data and materials**

314 The data used in this study are available in NHS England’s Secure Data Environment (SDE)  
315 service for England, but as restrictions apply they are not publicly available  
316 (<https://digital.nhs.uk/services/secure-data-environment-service>).

317 The CVD-COVID-UK/COVID-IMPACT programme led by the BHF Data Science Centre  
318 (<https://bhfdatasciencecentre.org/>) received approval to access data in NHS England’s SDE  
319 service for England from the Independent Group Advising on the Release of Data (IGARD)  
320 ([https://digital.nhs.uk/about-nhs-digital/corporate-information-and-](https://digital.nhs.uk/about-nhs-digital/corporate-information-and-documents/independent-group-advising-on-the-release-of-data)  
321 [documents/independent-group-advising-on-the-release-of-data](https://digital.nhs.uk/about-nhs-digital/corporate-information-and-documents/independent-group-advising-on-the-release-of-data)) via an application made in  
322 the Data Access Request Service (DARS) Online system (ref. DARS-NIC-381078-Y9C5K)  
323 ([https://digital.nhs.uk/services/data-access-request-service-dars/dars-products-and-](https://digital.nhs.uk/services/data-access-request-service-dars/dars-products-and-services)  
324 [services](https://digital.nhs.uk/services/data-access-request-service-dars/dars-products-and-services)).

325 The CVD-COVID-UK/COVID-IMPACT Approvals & Oversight Board  
326 (<https://bhfdatasciencecentre.org/areas/cvd-covid-uk-covid-impact/>) subsequently granted  
327 approval to this project to access the data within NHS England’s SDE service for England. The  
328 de-identified data used in this study were made available to accredited researchers only.  
329 Those wishing to gain access to the data should contact [bhfdsc@hdrug.ac.uk](mailto:bhfdsc@hdrug.ac.uk) in the first  
330 instance.

### 331 **Funding**

332 The British Heart Foundation Data Science Centre (grant No SP/19/3/34678, awarded to  
333 Health Data Research (HDR) UK) funded co-development (with NHS England) of the Secure  
334 Data Environment service for England, provision of linked datasets, data access, user software  
335 licences, computational usage, and data management and wrangling support, with additional  
336 contributions from the HDR UK Data and Connectivity component of the UK Government  
337 Chief Scientific Adviser's National Core Studies programme to coordinate national COVID-19  
338 priority research. Consortium partner organisations funded the time of contributing data  
339 analysts, biostatisticians, epidemiologists, and clinicians.

340 The associated costs of accessing data in NHS England's Secure Data Environment service for  
341 England, for analysts working on this study, were funded by the Data and Connectivity  
342 National Core Study, led by Health Data Research UK in partnership with the Office for  
343 National Statistics, which is funded by UK Research and Innovation (grant ref: MC\_PC\_20058).

344 The Baily Thomas Charitable Fund funded staff (FS) time on this project.

### 345 **Acknowledgements**

346 This work is carried out with the support of the BHF Data Science Centre led by HDR UK (BHF  
347 Grant no. SP/19/3/34678). This study makes use of de-identified data held in NHS England's  
348 Secure Data Environment service for England and made available via the BHF Data Science  
349 Centre's CVD-COVID-UK/COVID-IMPACT consortium. This work uses data provided by  
350 patients and collected by the NHS as part of their care and support. We would also like to  
351 acknowledge all data providers who make health relevant data available for research.

352 The authors would like to thank The Baily Thomas Charitable Fund for funding staff costs on  
353 this study.

### 354 **Data Availability Statement**

355 For the purpose of open access, the authors have applied a Creative Commons Attribution  
356 (CC BY) licence to any Author Accepted Manuscript version arising from this submission.

357

### 358 **References**

- 359 1. American Psychiatric Association. Diagnostic and statistical manual of mental disorders. 5th  
360 ed. Arlington: American Psychiatric Publishing; 2013.

- 361 2. Zeidan J, Fombonne E, Scora J, Ibrahim A, Durkin MS, Saxena S, et al. Global prevalence of  
362 autism: A systematic review update. *Autism Research*. 2022 May 1;15(5):778–90.
- 363 3. Salari N, Rasoulpoor S, Rasoulpoor S, Shohaimi S, Jafarpour S, Abdoli N, et al. The global  
364 prevalence of autism spectrum disorder: a comprehensive systematic review and meta-  
365 analysis. *Italian Journal of Pediatrics* 2022 48:1. 2022 Jul 8;48(1):1–16.
- 366 4. Talantseva OI, Romanova RS, Shurdova EM, Dolgorukova TA, Sologub PS, Titova OS, et al. The  
367 global prevalence of autism spectrum disorder: A three-level meta-analysis. *Frontiers in*  
368 *Psychiatry*. 2023 Feb 9;14:1071181.
- 369 5. Bishop-Fitzpatrick L, Rubenstein E. The physical and mental health of middle aged and older  
370 adults on the autism spectrum and the impact of intellectual disability. *Research in Autism*  
371 *Spectrum Disorders*. 2019 Jul 1;63:34–41.
- 372 6. Croen LA, Zerbo O, Qian Y, Massolo ML, Rich S, Sidney S, et al. The health status of adults on  
373 the autism spectrum. <http://dx.doi.org/10.1177/1362361315577517>. 2015 Apr 24;19(7):814–  
374 23.
- 375 7. NICE | The National Institute for Health and Care Excellence. Overview | Multimorbidity:  
376 clinical assessment and management | Guidance | NICE [Internet]. 2016 [cited 2023 Jul 3].  
377 Available from: <https://www.nice.org.uk/guidance/ng56>
- 378 8. Brondino N, Bertoglio F, Forneris F, Faravelli S, Borghesi A, Damiani S, et al. A Pilot Study on  
379 Covid and Autism: Prevalence, Clinical Presentation and Vaccine Side Effects. *Brain Sciences*  
380 2021, Vol 11, Page 860. 2021 Jun 28;11(7):860.
- 381 9. Fusar-Poli L, Brondino N, Rocchetti M, Petrosino B, Arillotta D, Damiani S, et al. Prevalence  
382 and predictors of psychotropic medication use in adolescents and adults with autism  
383 spectrum disorder in Italy: A cross-sectional study. *Psychiatry Research*. 2019 Jun 1;276:203–  
384 9.
- 385 10. May M, Slitzky M, Rostama B, Barlow D, Houseknecht KL. Antipsychotic-induced immune  
386 dysfunction: A consideration for COVID-19 risk. *Brain, Behavior, & Immunity - Health*. 2020 Jul  
387 1;6:100097.
- 388 11. Hossain MM, Khan N, Sultana A, Ma P, McKyer ELJ, Ahmed HU, et al. Prevalence of comorbid  
389 psychiatric disorders among people with autism spectrum disorder: An umbrella review of  
390 systematic reviews and meta-analyses. Vol. 287, *Psychiatry Research*. 2020.
- 391 12. Rydzewska E, Dunn K, Cooper SA. Umbrella systematic review of systematic reviews and  
392 meta-analyses on comorbid physical conditions in people with autism spectrum disorder. *The*  
393 *British journal of psychiatry : the journal of mental science*. 2021 Jan 1;218(1):10–9.
- 394 13. Forsyth L, Mcorley M, Rydzewska E. All-cause and cause-specific mortality in people with  
395 autism spectrum disorder: A systematic review. *Research in Autism Spectrum Disorders*.  
396 2023;105:102165.
- 397 14. Tsai SJ, Chang WH, Cheng CM, Liang CS, Bai YM, Hsu JW, et al. All-cause mortality and suicide  
398 mortality in autistic individuals: An entire population longitudinal study in Taiwan. *Autism*.  
399 2023 May 10;

- 400 15. Rydzewska E, Hughes-McCormack LA, Gillberg C, Henderson A, MacIntyre C, Rintoul J, et al.  
401 General health of adults with autism spectrum disorders – A whole country population cross-  
402 sectional study. *Research in Autism Spectrum Disorders*. 2019 Apr 1;60:59–66.
- 403 16. British Medical Association. Recognising the importance of physical health in mental health  
404 and intellectual disability: achieving parity of outcomes [Internet]. 2014 [cited 2023 Jul 3].  
405 Available from: [https://www.scie-socialcareonline.org.uk/recognising-the-importance-of-](https://www.scie-socialcareonline.org.uk/recognising-the-importance-of-physical-health-in-mental-health-and-intellectual-disability-achieving-parity-of-outcomes/r/a11G0000004Gp6QIAS)  
406 [physical-health-in-mental-health-and-intellectual-disability-achieving-parity-of-](https://www.scie-socialcareonline.org.uk/recognising-the-importance-of-physical-health-in-mental-health-and-intellectual-disability-achieving-parity-of-outcomes/r/a11G0000004Gp6QIAS)  
407 [outcomes/r/a11G0000004Gp6QIAS](https://www.scie-socialcareonline.org.uk/recognising-the-importance-of-physical-health-in-mental-health-and-intellectual-disability-achieving-parity-of-outcomes/r/a11G0000004Gp6QIAS)
- 408 17. Hirvikoski T, Mittendorfer-Rutz E, Boman M, Larsson H, Lichtenstein P, Bölte S. Premature  
409 mortality in autism spectrum disorder. *The British Journal of Psychiatry*. 2016 Mar  
410 1;208(3):232–8.
- 411 18. Catalá-López F, Hutton B, Page MJ, Driver JA, Ridao M, Alonso-Arroyo A, et al. Mortality in  
412 Persons With Autism Spectrum Disorder or Attention-Deficit/Hyperactivity Disorder: A  
413 Systematic Review and Meta-analysis. *JAMA Pediatrics*. 2022 Apr 1;176(4):e216401–e216401.
- 414 19. Charlson ME, Pompei P, Ales KL, MacKenzie CR. A new method of classifying prognostic  
415 comorbidity in longitudinal studies: development and validation. *Journal of chronic diseases*.  
416 1987;40(5):373–83.
- 417 20. Elixhauser A, Steiner C, Harris DR, Coffey RM. Comorbidity Measures for Use with  
418 Administrative Data. *Medical Care*. 1998;36(1):8–27.
- 419 21. Van Walraven C, Austin PC, Jennings A, Quan H, Forster AJ. A modification of the Elixhauser  
420 comorbidity measures into a point system for hospital death using administrative data.  
421 *Medical care*. 2009 Jun;47(6):626–33.
- 422 22. Diederichs C, Berger K, Bartels DB. The Measurement of Multiple Chronic Diseases—A  
423 Systematic Review on Existing Multimorbidity Indices. *The Journals of Gerontology: Series A*.  
424 2011 Mar 1;66A(3):301–11.
- 425 23. Stirland LE, González-Saavedra L, Mullin DS, Ritchie CW, Muniz-Terrera G, Russ TC. Measuring  
426 multimorbidity beyond counting diseases: systematic review of community and population  
427 studies and guide to index choice. *BMJ*. 2020 Feb 18;368.
- 428 24. Quan H, Li B, Couris CM, Fushimi K, Graham P, Hider P, et al. Updating and Validating the  
429 Charlson Comorbidity Index and Score for Risk Adjustment in Hospital Discharge Abstracts  
430 Using Data From 6 Countries. *Am J Epidemiol* [Internet]. 2011 Mar 15 [cited 2023 Jul  
431 3];173(6):676–82. Available from: <https://dx.doi.org/10.1093/aje/kwq433>
- 432 25. Hossain MM, Khan N, Sultana A, Ma P, McKyer ELJ, Ahmed HU, et al. Prevalence of comorbid  
433 psychiatric disorders among people with autism spectrum disorder: An umbrella review of  
434 systematic reviews and meta-analyses. *Psychiatry Research*. 2020 Mar 18;287:112922–  
435 112922.
- 436 26. Rydzewska E, Dunn K, Cooper SA. Umbrella systematic review of systematic reviews and  
437 meta-analyses on comorbid physical conditions in people with autism spectrum disorder. *The*  
438 *British Journal of Psychiatry*. 2021 Jan 1;218(1):10–9.

- 439 27. Hwang YI (Jane), Srasuebkul P, Foley KR, Arnold S, Trollor JN. Mortality and cause of death of  
440 Australians on the autism spectrum. *Autism research : official journal of the International*  
441 *Society for Autism Research*. 2019 May 1;12(5):806–15.
- 442 28. Nijhof D, Sosenko F, MacKay D, Fleming M, Jani B, Pell J, et al. COVID-19 hospitalisations and  
443 mortality in autistic people: A whole-country population study. Manuscript in preparation.
- 444 29. Sosenko F, Mackay D, Bhautesh DJ, Fleming M, Pell JP, Hatton C, et al. Understanding covid-  
445 19 outcomes among people with Intellectual Disabilities in England. *BMC Public Health*.  
446 2023;23(2099).
- 447 30. Sosenko F, Mackay D, Bhautesh DJ, Fleming M, Pell JP, Hatton C, et al. Understanding covid-  
448 19 outcomes among people with Intellectual Disabilities in England. *BMC Public Health*.
- 449 31. Nijhof D, Sosenko F, MacKay D, Fleming M, Jani B, Pell J, et al. COVID-19 hospitalisations and  
450 mortality in autistic people: A whole-country population study. Manuscript in preparation.
- 451 32. Cassell A, Edwards D, Harshfield A, Rhodes K, Brimicombe J, Payne R, et al. The epidemiology  
452 of multimorbidity in primary care: a retrospective cohort study. *British Journal of General*  
453 *Practice [Internet]*. 2018 Apr 1 [cited 2023 Jul 17];68(669):e245–51. Available from:  
454 <https://bjgp.org/content/68/669/e245>
- 455 33. Quan H, Li B, Couris CM, Fushimi K, Graham P, Hider P, et al. Updating and Validating the  
456 Charlson Comorbidity Index and Score for Risk Adjustment in Hospital Discharge Abstracts  
457 Using Data From 6 Countries. *American Journal of Epidemiology*. 2011 Mar 15;173(6):676–82.
- 458 34. Zhou Y, Chi J, Lv W, Wang Y. Obesity and diabetes as high-risk factors for severe coronavirus  
459 disease 2019 (Covid-19). *Diabetes/Metabolism Research and Reviews*. 2021 Feb  
460 1;37(2):e3377.
- 461 35. Saha S, Al-Rifai RH, Saha S. Diabetes prevalence and mortality in COVID-19 patients: a  
462 systematic review, meta-analysis, and meta-regression. 2021;
- 463 36. Zhang Y, Lin F, Tu W, Zhang J, Choudhry AA, Ahmed O, et al. Thyroid dysfunction may be  
464 associated with poor outcomes in patients with COVID-19. *Molecular and Cellular*  
465 *Endocrinology*. 2021 Feb 2;521:111097.
- 466 37. Shmueli G. To Explain or to Predict? <https://doi.org/10.1214/10-STS330>. 2010 Aug  
467 1;25(3):289–310.

468

469

## 470 **Tables and figures**

471 *Table 1. Demographic and health characteristics of autistic adults hospitalised for COVID-19.*

|                   | <b>Covid-19 hospitalised adults who subsequently died from covid</b> | <b>Covid-19 hospitalised adults who subsequently did not die from covid</b> | <b>All covid-19 hospitalised adults</b> |
|-------------------|----------------------------------------------------------------------|-----------------------------------------------------------------------------|-----------------------------------------|
| Total N (rounded) | 60                                                                   | 965                                                                         | 1,030                                   |

| Demographic information                    |                   |                   |                   |
|--------------------------------------------|-------------------|-------------------|-------------------|
| Age (median, IQR)                          | 63.4 [48.9, 75.2] | 31.1 [23.6, 50.0] | 32.3 [24.0, 53.0] |
| Female (%)                                 | 19.4              | 40.6              | 39.3              |
| IMD decile (mean)                          | 4.8               | 4.6               | 4.6               |
| Ethnicity (%)                              |                   |                   |                   |
| White                                      | 96.8              | 89.5              | 90.0              |
| Asian                                      | <10 CASES         | 3.2               | 3.1               |
| Black                                      | <10 CASES         | 2.7               | 2.5               |
| Mixed                                      | <10 CASES         | 2.7               | 2.6               |
| Other                                      | <10 CASES         | 1.5               | 1.4               |
| Long-term conditions (%)                   |                   |                   |                   |
| Count of LTC (mean)                        | 11.0              | 7.4               | 7.6               |
| Alcohol problems                           | 33.9              | 31.3              | 31.5              |
| Anorexia or bulimia                        | <10 CASES         | 8.3               | 8.1               |
| Anxiety & other neurotic                   | 64.5              | 58.8              | 59.1              |
| Asthma (currently treated)                 | 27.4              | 27.9              | 27.9              |
| Atrial fibrillation                        | 33.9              | 10.4              | 11.8              |
| Blindness and low vision                   | <10 CASES         | 6.7               | 7.0               |
| Bronchiectasis                             | <10 CASES         | <10 CASES         | 1.0               |
| Cancer - [New]Diagnosis in last five years | 40.3              | 18.0              | 19.4              |
| Coronary heart disease                     | 58.1              | 19.6              | 21.9              |
| Chronic kidney disease                     | <10 CASES         | 1.2               | 1.2               |
| Chronic Liver Disease and Viral Hepatitis  | 43.6              | 32.5              | 33.2              |
| COPD                                       | 24.2              | 10.0              | 10.8              |
| Dementia                                   | 51.6              | 52.5              | 52.5              |
| Depression                                 | 38.7              | 43.0              | 42.8              |
| Diabetes                                   | 85.5              | 37.8              | 40.7              |



|                                                                       |           |           |           |
|-----------------------------------------------------------------------|-----------|-----------|-----------|
| Diverticular disease of intestine                                     | 43.6      | 25.6      | 26.7      |
| Epilepsy (currently treated)                                          | 43.6      | 21.6      | 22.9      |
| Heart failure                                                         | 61.3      | 22.7      | 25.0      |
| Hearing loss                                                          | <10 CASES | 6.1       | 6.6       |
| Hypertension                                                          | 66.1      | 24.6      | 27.1      |
| Inflammatory bowel disease                                            | 17.7      | 14.6      | 14.8      |
| Irritable bowel syndrome                                              | <10 CASES | 9.3       | 9.4       |
| Migraine                                                              | <10 CASES | 5.5       | 5.7       |
| Multiple sclerosis                                                    | <10 CASES | <10 CASES | <10 CASES |
| Peptic Ulcer Disease                                                  | <10 CASES | 10.8      | 10.9      |
| Parkinson's disease                                                   | <10 CASES | 2.1       | 2.3       |
| Prostate disorders                                                    | <10 CASES | 6.8       | 7.2       |
| Psychoactive substance misuse (not alcohol)                           | 64.5      | 62.3      | 62.4      |
| Psoriasis or eczema                                                   | <10 CASES | 7.2       | 7.2       |
| Peripheral vascular disease                                           | 22.6      | 7.2       | 8.1       |
| Rheumatoid arthritis                                                  | 22.6      | 15.2      | 15.7      |
| Schizophrenia (and related non-organic psychosis) or bipolar disorder | 83.9      | 78.9      | 79.2      |
| Chronic sinusitis                                                     | <10 CASES | 1.4       | 1.4       |
| Stroke & transient ischaemic attack                                   | 62.9      | 51.1      | 51.8      |
| Thyroid disorders                                                     | 17.7      | 5.6       | 6.3       |

472

473

474 *Table 2. Logistic Regression results for the models using the Quan Index and the ASD-MI*

|                              | Odds Ratio | 95% Confidence Interval | P-value |
|------------------------------|------------|-------------------------|---------|
| <b>Model with Quan Index</b> |            |                         |         |
| Age at COVID                 | 1.06       | 1.05, 1.08              | 0.000   |
| Quan Index score             | 1.16       | 0.98, 1.37              | 0.081   |
| Constant                     | 0.00       | 0.00, 0.01              | 0.000   |

| <b>Model with ASD-MI</b>   |      |            |       |
|----------------------------|------|------------|-------|
| Age (at COVID)             | 1.05 | 1.03, 1.07 | 0.000 |
| Multimorbidity Index score | 2.72 | 1.78, 4.14 | 0.000 |
| Constant                   | 0.00 | 0.00, 0.01 | 0.000 |

475

476

477
